# Supplementary material
Source: PubMed Central journal article supplement (PMC4068680)
Supplement: AEM.00881-14_zam999105489so1.pdf [file AEM.00881-14_zam999105489so1.pdf]

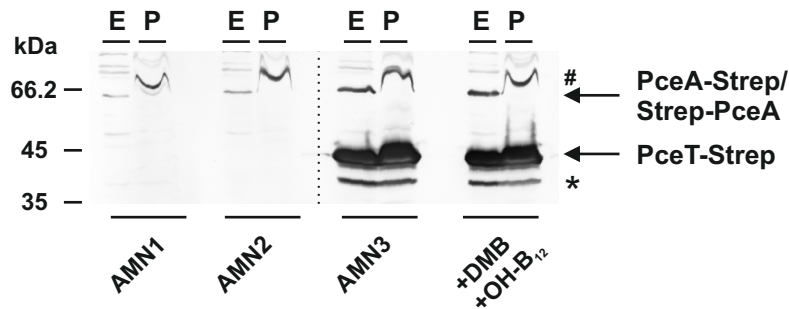

**Fig. S1:** Immunological detection of the PceA and PceT protein in crude extracts (E) and particulate fractions (P) obtained from cells of *S. blattae* strains expressing the *pceA* and *pceT* gene from *D. hafniense* Y51. The particulate fractions were obtained by low-speed centrifugation after cell disruption (for details see the Materials and Methods section). The cells were cultivated in the absence of fumarate and in the presence of 0.02% yeast extract. *S. blattae* strains used: AMN1 (*pceA*<sub>Y51</sub>-CStrep), AMN2 (NStrep-*pceA*<sub>Y51</sub>), and AMN3 (NStrep-*pceA*<sub>Y51</sub>, *pceT*<sub>Y51</sub>-CStrep). DMB = 5,6-dimethylbenzimidazole, OH-B<sub>12</sub> = hydroxocobalamin. The immunoblot was developed with antibodies directed against the Strep-tag. Crude extracts and resuspended particulate fractions were separated on a 12.5% SDS-PAGE (10 µg protein per lane). The PceA protein in the particulate fraction displayed a retarded migration (#). A degradation product of PceT-Strep is marked by an asterisk.

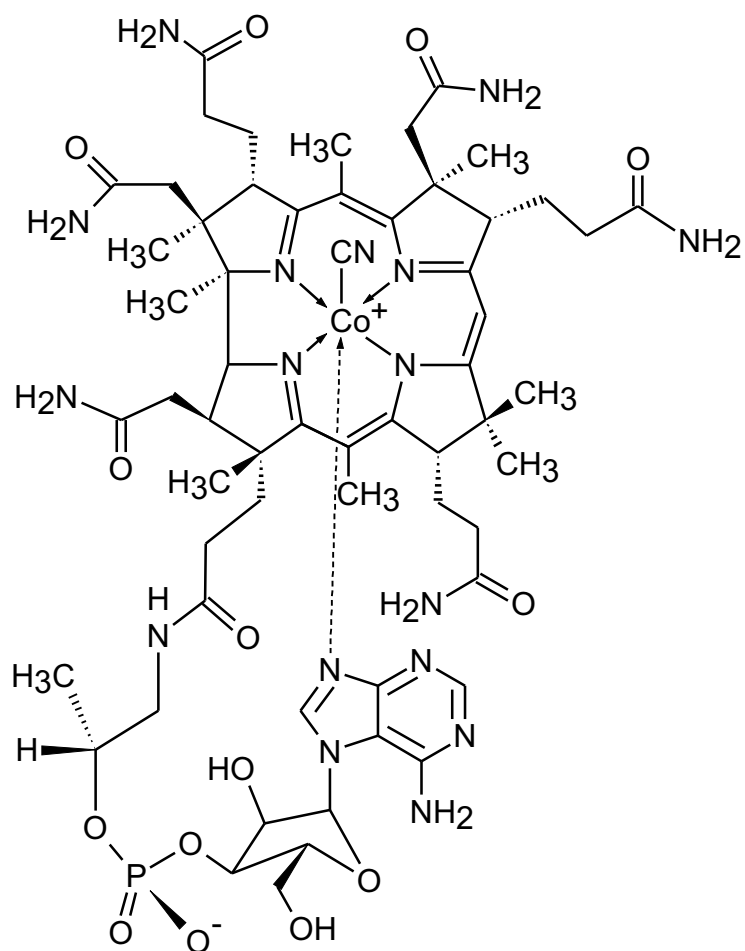

**Fig. S2:** Structure of pseudovitamin B<sub>12</sub> (Co<sub>β</sub>-cyano-Co<sub>α</sub>-adeninyl-cobamide). The position of carbon atom 176 is indicated.
